# Supplementary material for: Incidence, Risk Factors, and Outcomes of Kidney Transplant Recipients With BK Polyomavirus-Associated Nephropathy
Source: PubMed Central journal article supplement — Kidney Int Rep. 2022 Dec 30;8(3):531–43. doi: 10.1016/j.ekir.2022.12.020 (PMC10014440; doi:10.1016/j.ekir.2022.12.020), 2022-12-30

Figure S1. Cumulative Incidence of BKPyVAN by Era

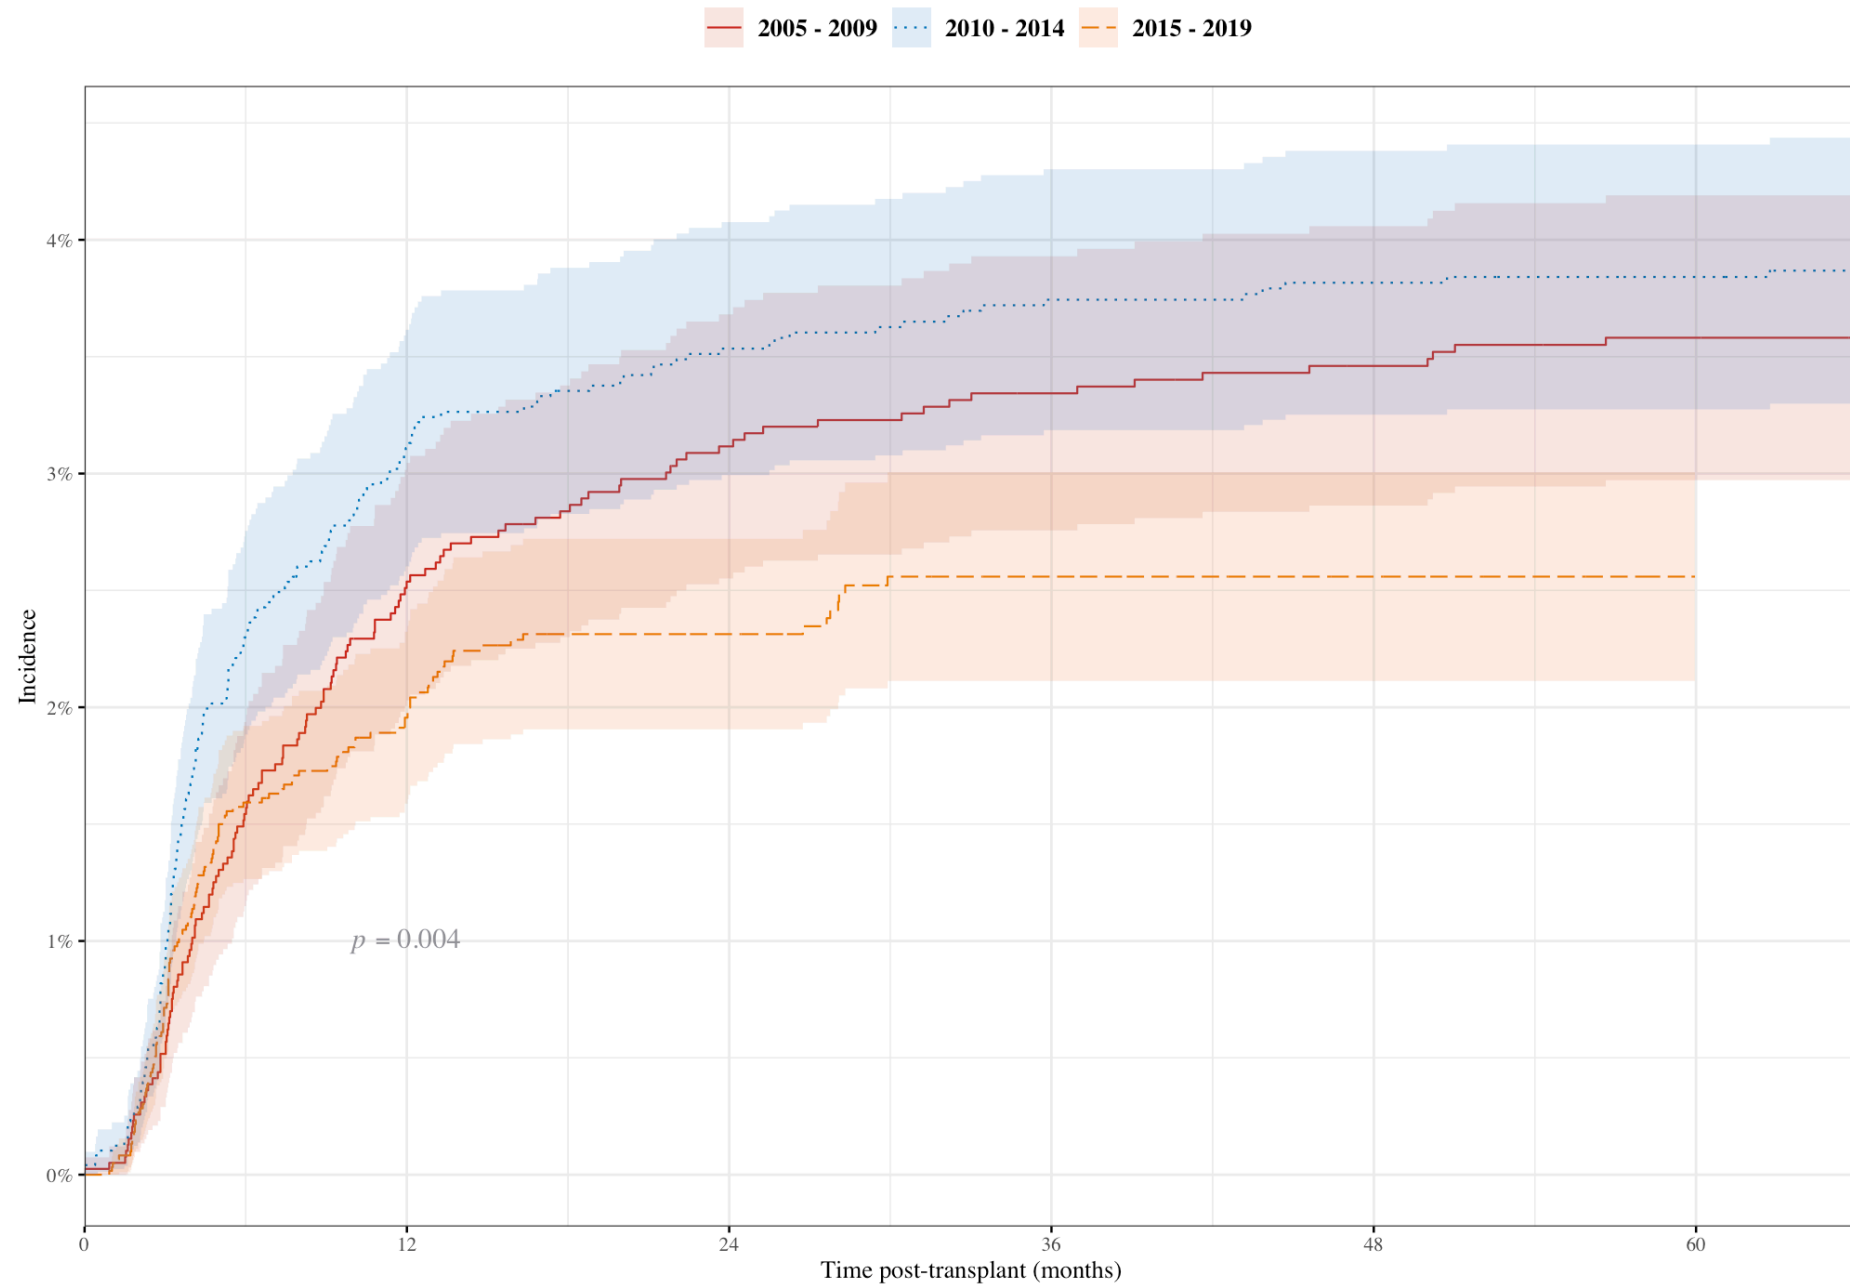

**Figure S2. All-cause graft survival after BKPyVAN**

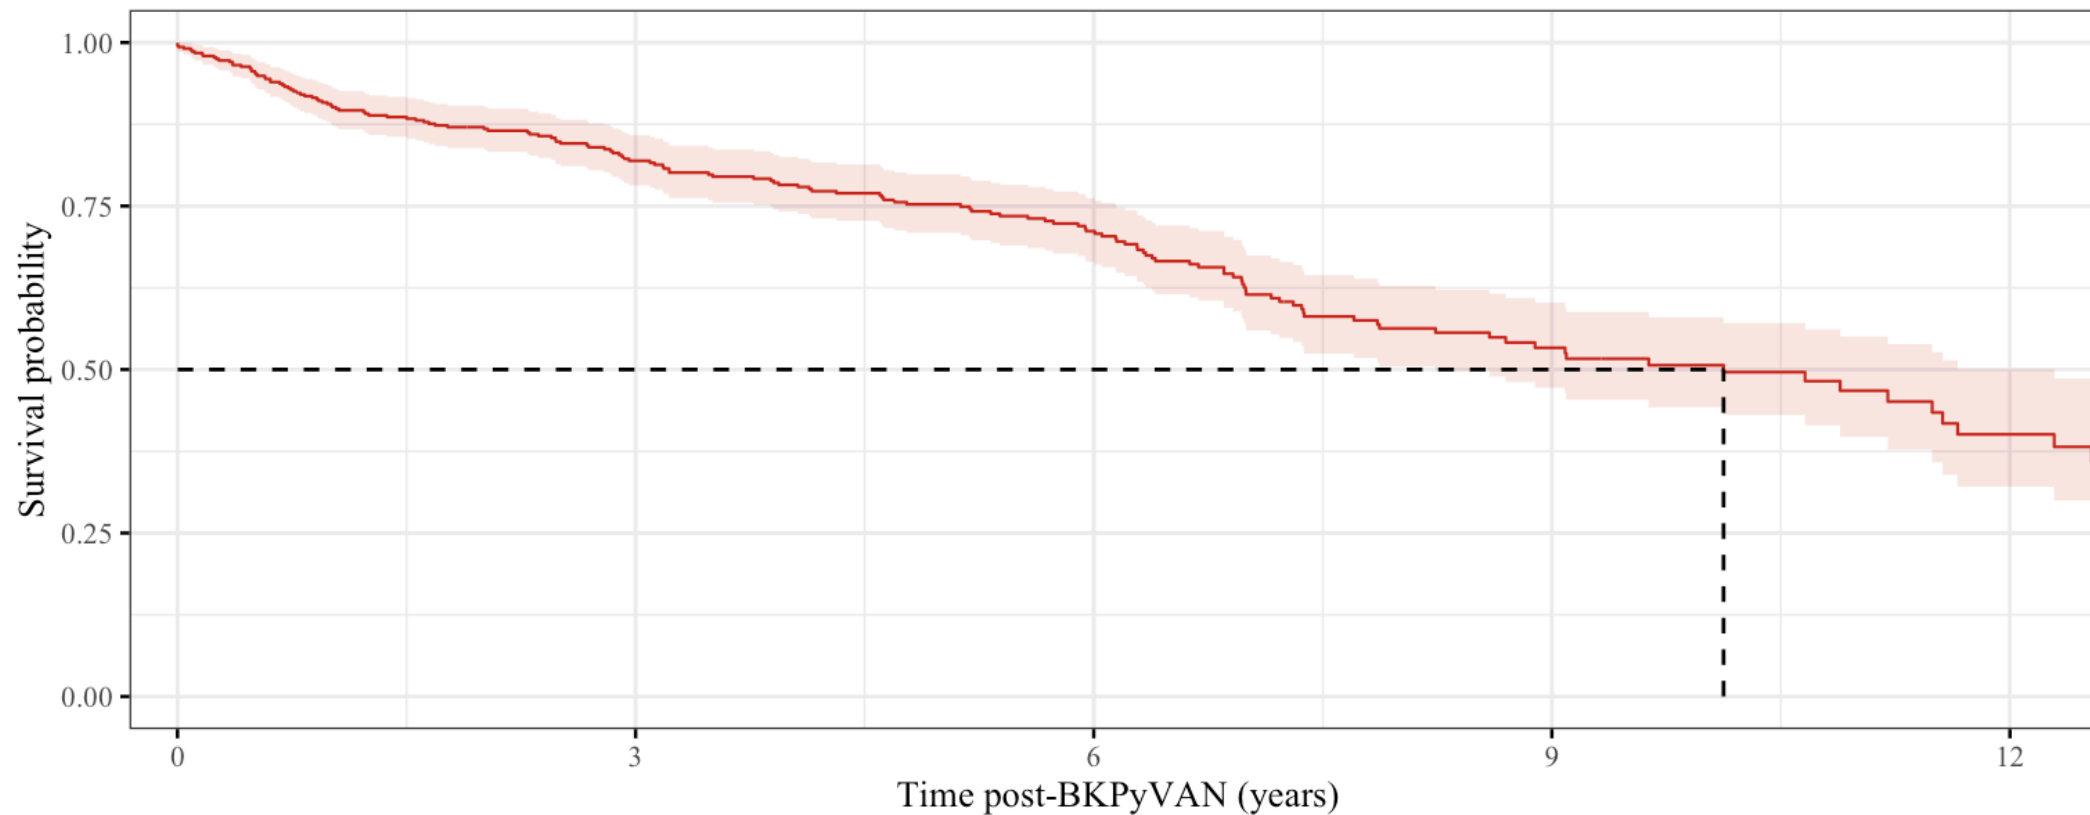

**Number at risk**

|     |     |     |     |    |    |
|-----|-----|-----|-----|----|----|
| All | 441 | 274 | 181 | 64 | 21 |
|-----|-----|-----|-----|----|----|

**Cumulative number of events**

|     |   |    |     |     |     |
|-----|---|----|-----|-----|-----|
| All | 2 | 72 | 104 | 138 | 148 |
|-----|---|----|-----|-----|-----|

Figure S3. Adjusted survival curves

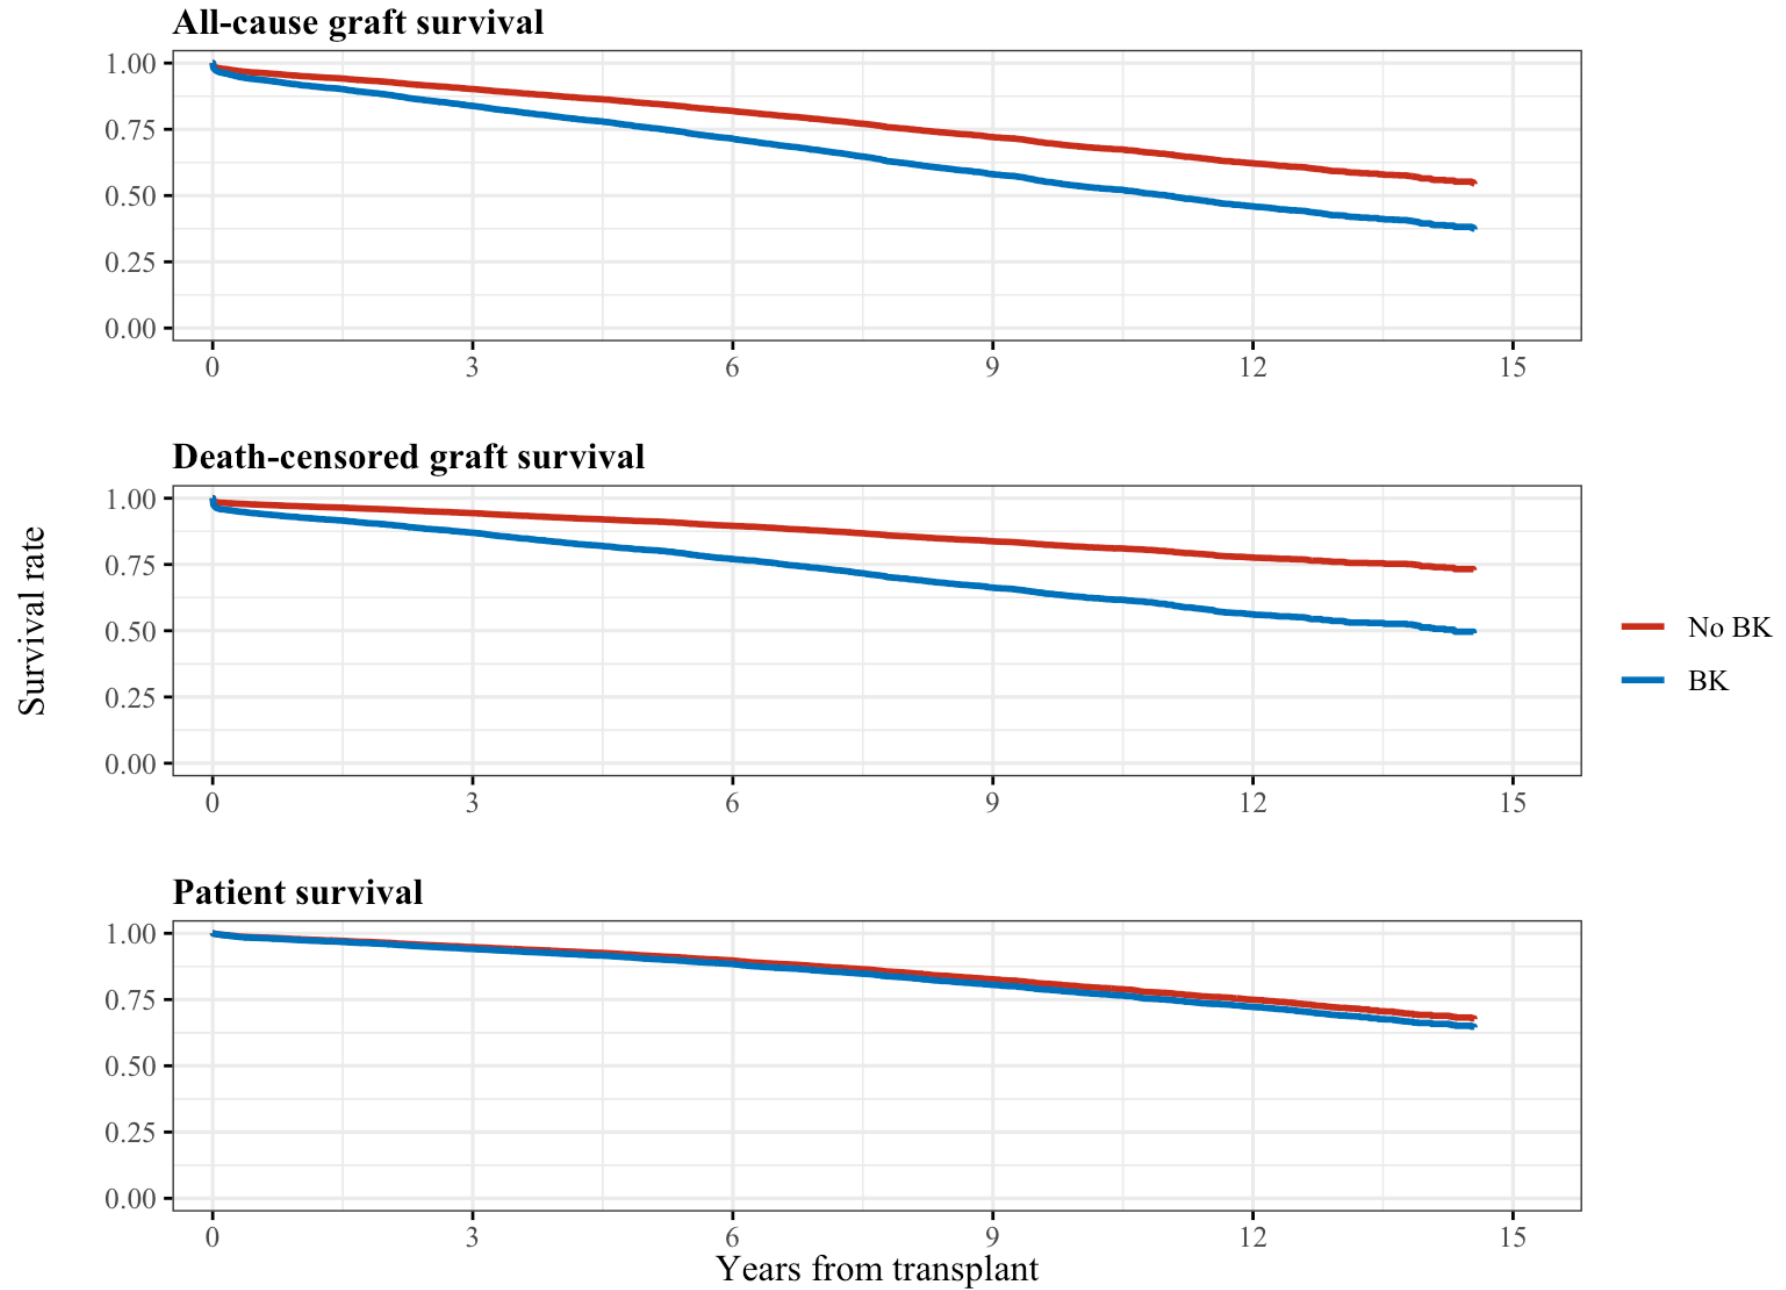

Supplement: mmc1.pdf [file mmc1.pdf]
